# Supplementary material for: Steric, geometrical and solvent effects on redox potentials in salen-type copper(ii) complexes
Source: Royal Society of Chemistry journal article supplement (doi:10.1039/b906013h), 2009-01-01
Supplement: b906013h.pdf [file b906013h.pdf]

## Supplementary Information

### Steric, geometrical and solvent effects on redox potentials in salen-type copper(II) complexes

Masakazu Hirotsu,<sup>\*a</sup> Naoto Kuwamura,<sup>a</sup> Isamu Kinoshita,<sup>a</sup> Masaaki Kojima,<sup>b</sup> Yuzo Yoshikawa<sup>b</sup> and Keiji Ueno<sup>c</sup>

<sup>a</sup> Department of Material Science, Graduate School of Science, Osaka City University, Sumiyoshi-ku, Osaka 558-8585, Japan. Fax: 816 6690 2753; Tel: 816 6605 2546; E-mail: mhiro@sci.osaka-cu.ac.jp

<sup>b</sup> Department of Chemistry, Faculty of Science, Okayama University, 3-1-1 Tsushima-naka, Okayama 700-8530, Japan

<sup>c</sup> Department of Chemistry and Biochemistry, Graduate School of Engineering, Gunma University, Kiryu 376-8515, Japan

### Experimental

**Cyclic voltammetric measurements.** Cyclic voltammetric measurements were performed using an ALS/CHI600A voltammetric analyzer (Bioanalytical Systems Inc.). Cyclic voltammograms were recorded at room temperature. A glassy carbon disk electrode with a diameter of 3 mm was used as a working electrode. A platinum wire auxiliary electrode and an Ag/Ag<sup>+</sup> (Ag/0.01 M AgNO<sub>3</sub>, 1 M = 1 mol dm<sup>-3</sup>) reference electrode were used in a three electrode system. Sample solutions containing 0.1 M Bu<sub>4</sub>NBF<sub>4</sub> as a supporting electrolyte were prepared in the concentration of 0.5—2.4 mM and deoxygenated with pure argon before measurements. The electrode potentials reported here were corrected using the redox potential of ferrocenium/ferrocene  $E^{0'}(\text{Fc}^{+/0})$  as an external standard redox couple.

Cyclic voltammetry was performed at various scan rates. No significant change of  $E_{1/2}$  for the Cu<sup>II/I</sup> couple was observed when the scan rate was varied from 50 to 1000 mVs<sup>-1</sup>. The data at 100 mVs<sup>-1</sup> were presented in the text (Fig. 3 and Table 3). Figs. S1, S2, and S3 show the cyclic voltammograms of *rac*-**1**, *meso*-**1**, and **2** in acetonitrile, respectively, at scan rates at 50, 100, 300, 500, and 1000 mVs<sup>-1</sup>.

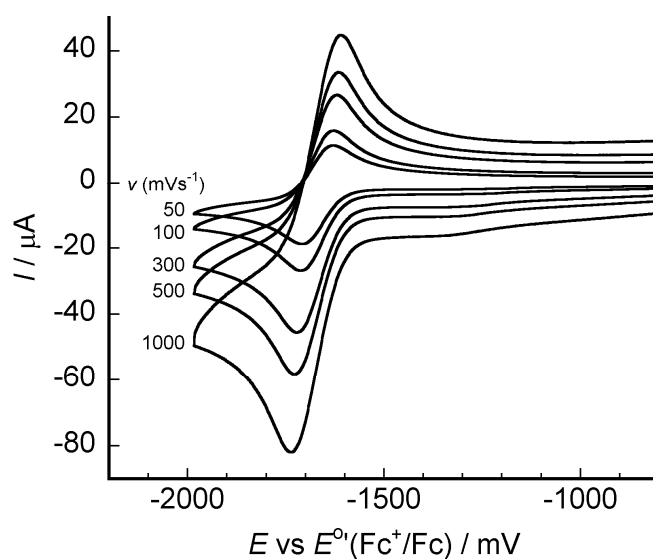

**Fig. S1.** Cyclic voltammograms of *rac-1* (1.1 mM) in acetonitrile containing 0.1 M  $\text{Bu}_4\text{NBF}_4$ ; scan rate ( $v$ ), 50, 100, 300, 500, 1000  $\text{mVs}^{-1}$ ; working electrode, glassy carbon; auxiliary electrode, platinum wire; reference electrode,  $\text{Ag}/\text{Ag}^+$ .

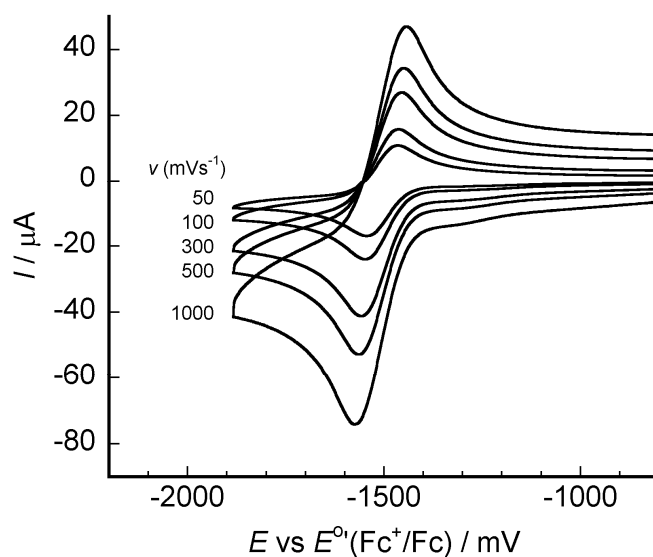

**Fig. S2.** Cyclic voltammograms of *meso-1* (1.1 mM) in acetonitrile containing 0.1 M  $\text{Bu}_4\text{NBF}_4$ ; scan rate ( $v$ ), 50, 100, 300, 500, 1000  $\text{mVs}^{-1}$ ; working electrode, glassy carbon; auxiliary electrode, platinum wire; reference electrode,  $\text{Ag}/\text{Ag}^+$ .

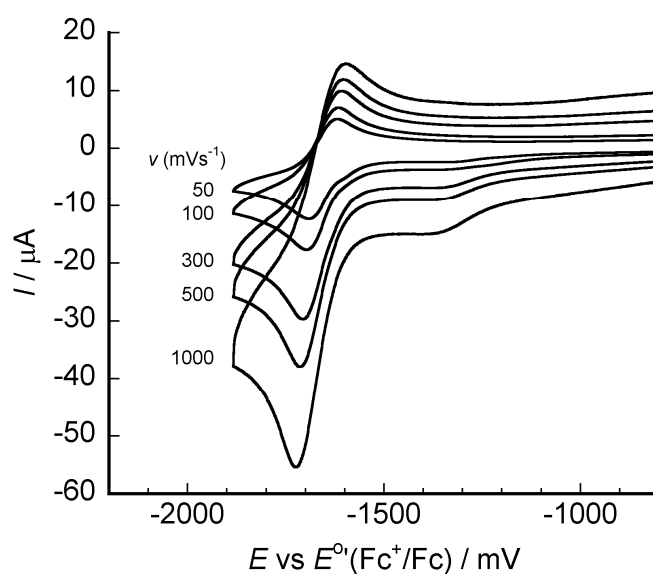

**Fig. S3.** Cyclic voltammograms of **2** (0.49 mM) in acetonitrile containing 0.1 M Bu<sub>4</sub>NBF<sub>4</sub>; scan rate ( $v$ ), 50, 100, 300, 500, 1000 mVs<sup>-1</sup>; working electrode, glassy carbon; auxiliary electrode, platinum wire; reference electrode, Ag/Ag<sup>+</sup>.

**Computational details.** Structure optimization of the complexes was performed using the Gaussian 03 program package.<sup>1</sup> The B3LYP density functional method and the LANL2DZ basis set were used for complexes *rac-1*, *meso-1*, and **2**. The initial models for *rac-1* and *meso-1* were obtained from the crystal structures analyzed in this work. The initial model for **2** was obtained the crystal structure in reference 2. The calculations of copper(I) complexes [*rac-1*]<sup>-</sup>, [*meso-1*]<sup>-</sup>, and [**2**]<sup>-</sup> were performed using the optimized structures of the corresponding copper(II) complexes as the initial model. The optimized structures of *rac-1*, *meso-1*, **2**, [*rac-1*]<sup>-</sup>, [*meso-1*]<sup>-</sup>, and [**2**]<sup>-</sup> were shown in Figs. S4, S5, S6, S7, S8, and S9, and their molecular coordinates are listed in Tables S1, S2, S3, S4, S5, and S6, respectively.

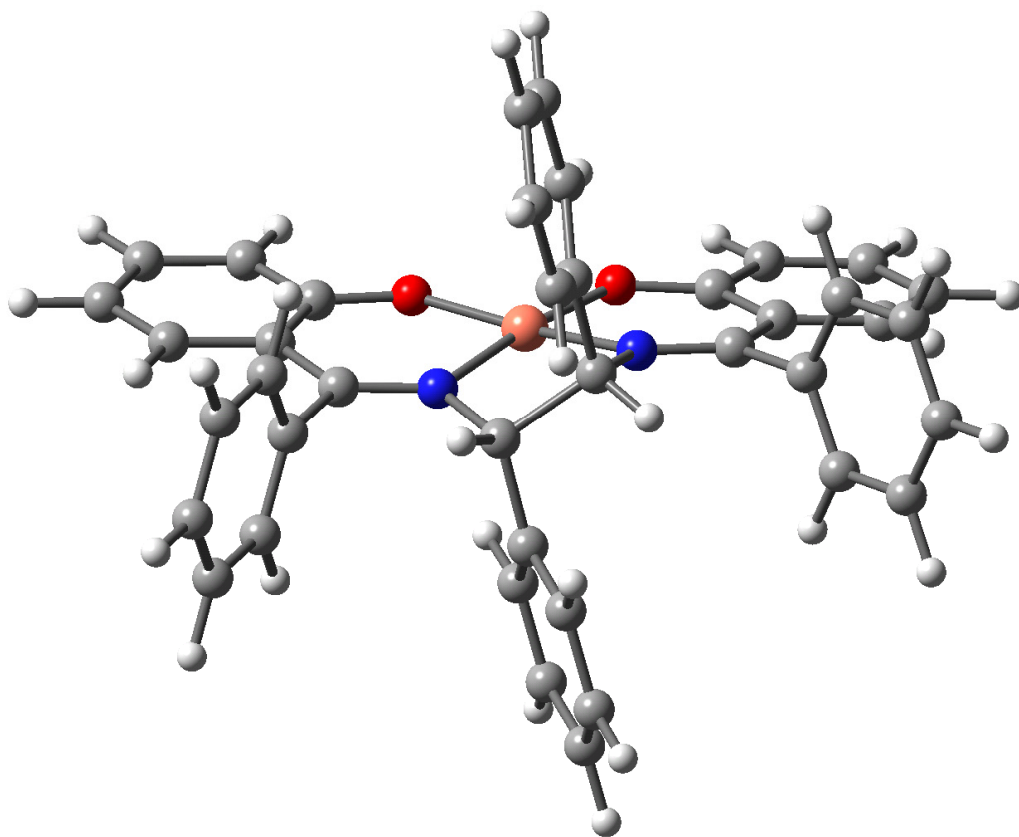

**Fig. S4.** Molecular structure of *rac-1* optimized by the DFT calculation.

**Table S4.** Molecular coordinates of *rac-1* optimized by the density functional calculation

|    | Atomic number | $x/\text{\AA}$ | $y/\text{\AA}$ | $z/\text{\AA}$ |
|----|---------------|----------------|----------------|----------------|
| 1  | 29            | -0.000062      | 1.652242       | 0.000143       |
| 2  | 8             | -1.374634      | 2.987441       | 0.035001       |
| 3  | 8             | 1.374480       | 2.987517       | -0.034390      |
| 4  | 7             | -1.346167      | 0.203342       | -0.169360      |
| 5  | 7             | 1.346159       | 0.203439       | 0.169512       |
| 6  | 6             | -2.687863      | 2.827814       | 0.136797       |
| 7  | 6             | -3.478348      | 4.015807       | 0.285599       |
| 8  | 6             | -4.860868      | 3.960705       | 0.405782       |
| 9  | 6             | -5.538749      | 2.709171       | 0.380458       |
| 10 | 6             | -4.801934      | 1.541524       | 0.230452       |

|    |   |           |           |           |
|----|---|-----------|-----------|-----------|
| 11 | 6 | -3.372965 | 1.549495  | 0.103618  |
| 12 | 6 | -2.667878 | 0.289132  | -0.076363 |
| 13 | 6 | -3.496623 | -0.974804 | -0.163347 |
| 14 | 6 | -3.816695 | -1.693002 | 1.008725  |
| 15 | 6 | -4.588523 | -2.867489 | 0.932047  |
| 16 | 6 | -5.049716 | -3.331476 | -0.315635 |
| 17 | 6 | -4.733972 | -2.614701 | -1.486225 |
| 18 | 6 | -3.961247 | -1.440744 | -1.410791 |
| 19 | 6 | -0.659651 | -1.084921 | -0.424541 |
| 20 | 6 | -0.361340 | -1.309704 | -1.913889 |
| 21 | 6 | -0.011021 | -2.610925 | -2.338397 |
| 22 | 6 | 0.294917  | -2.873817 | -3.684614 |
| 23 | 6 | 0.254154  | -1.832607 | -4.633597 |
| 24 | 6 | -0.100356 | -0.535139 | -4.220761 |
| 25 | 6 | -0.407898 | -0.275804 | -2.871295 |
| 26 | 6 | 2.687655  | 2.827929  | -0.137002 |
| 27 | 6 | 3.478032  | 4.015940  | -0.286213 |
| 28 | 6 | 4.860487  | 3.960867  | -0.407173 |
| 29 | 6 | 5.538412  | 2.709350  | -0.382243 |
| 30 | 6 | 4.801707  | 1.541684  | -0.231830 |
| 31 | 6 | 3.372810  | 1.549628  | -0.104220 |
| 32 | 6 | 2.667838  | 0.289258  | 0.076154  |
| 33 | 6 | 3.496663  | -0.974619 | 0.163195  |
| 34 | 6 | 3.961626  | -1.440220 | 1.410640  |
| 35 | 6 | 4.734399  | -2.614138 | 1.486178  |
| 36 | 6 | 5.049864  | -3.331202 | 0.315689  |
| 37 | 6 | 4.588338  | -2.867548 | -0.931993 |
| 38 | 6 | 3.816449  | -1.693108 | -1.008775 |
| 39 | 6 | 0.659715  | -1.084767 | 0.425103  |
| 40 | 6 | 0.361465  | -1.309107 | 1.914534  |
| 41 | 6 | 0.407946  | -0.274906 | 2.871619  |
| 42 | 6 | 0.100520  | -0.533871 | 4.221185  |
| 43 | 6 | -0.253789 | -1.831257 | 4.634442  |
| 44 | 6 | -0.294479 | -2.872763 | 3.685779  |
| 45 | 6 | 0.011337  | -2.610243 | 2.339464  |
| 46 | 1 | -2.938138 | 4.957832  | 0.302607  |
| 47 | 1 | -5.429049 | 4.881877  | 0.520130  |

|    |   |           |           |           |
|----|---|-----------|-----------|-----------|
| 48 | 1 | -6.620288 | 2.668429  | 0.474620  |
| 49 | 1 | -5.323498 | 0.590230  | 0.206884  |
| 50 | 1 | -3.465619 | -1.334407 | 1.973417  |
| 51 | 1 | -4.831163 | -3.412317 | 1.841125  |
| 52 | 1 | -5.649507 | -4.236570 | -0.374381 |
| 53 | 1 | -5.088184 | -2.964412 | -2.452765 |
| 54 | 1 | -3.723651 | -0.887871 | -2.316038 |
| 55 | 1 | -1.265959 | -1.926780 | -0.072841 |
| 56 | 1 | 0.010803  | -3.426569 | -1.616511 |
| 57 | 1 | 0.556157  | -3.883338 | -3.993843 |
| 58 | 1 | 0.488643  | -2.032100 | -5.676504 |
| 59 | 1 | -0.138727 | 0.275574  | -4.944405 |
| 60 | 1 | -0.693456 | 0.729345  | -2.574222 |
| 61 | 1 | 2.937796  | 4.957956  | -0.302896 |
| 62 | 1 | 5.428583  | 4.882053  | -0.521829 |
| 63 | 1 | 6.619898  | 2.668634  | -0.477018 |
| 64 | 1 | 5.323299  | 0.590397  | -0.208562 |
| 65 | 1 | 3.724242  | -0.887119 | 2.315804  |
| 66 | 1 | 5.088863  | -2.963596 | 2.452717  |
| 67 | 1 | 5.649695  | -4.236265 | 0.374514  |
| 68 | 1 | 4.830755  | -3.412606 | -1.840993 |
| 69 | 1 | 3.465090  | -1.334787 | -1.973466 |
| 70 | 1 | 1.266041  | -1.926715 | 0.073644  |
| 71 | 1 | 0.693342  | 0.730196  | 2.574229  |
| 72 | 1 | 0.138823  | 0.277072  | 4.944574  |
| 73 | 1 | -0.488187 | -2.030461 | 5.677425  |
| 74 | 1 | -0.555571 | -3.882223 | 3.995332  |
| 75 | 1 | -0.010445 | -3.426112 | 1.617830  |

---

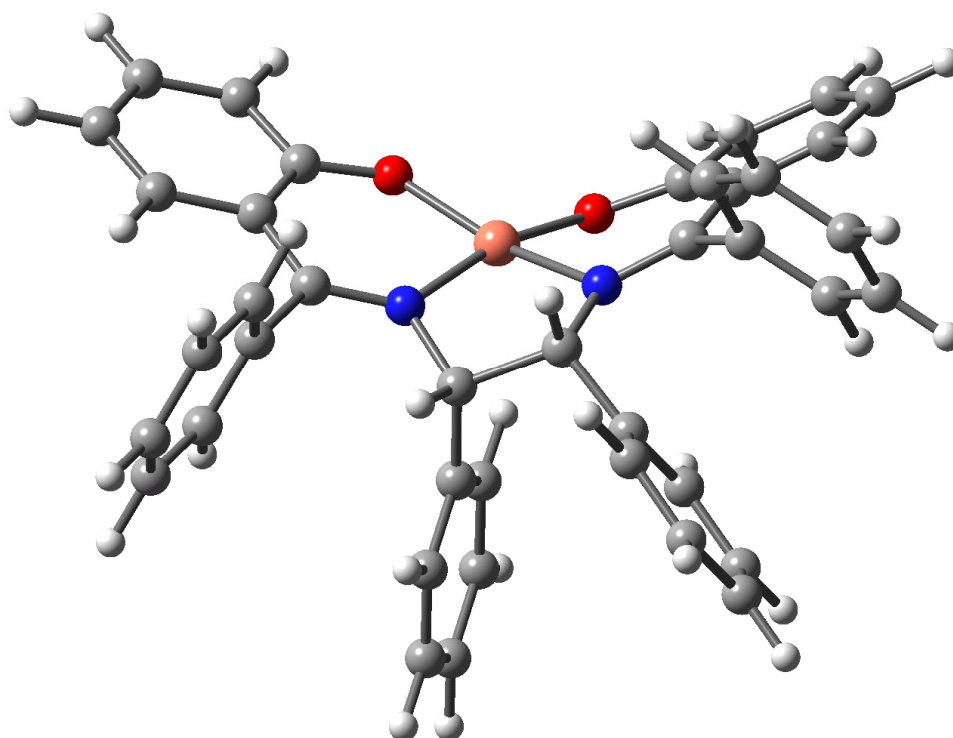

**Fig. S5.** Molecular structure of *meso-1* optimized by the DFT calculation.

**Table S2.** Molecular coordinates of *meso-1* optimized by the density functional calculation

|    | Atomic number | $x/\text{Å}$ | $y/\text{Å}$ | $z/\text{Å}$ |
|----|---------------|--------------|--------------|--------------|
| 1  | 29            | 0.263601     | 1.664103     | 0.430954     |
| 2  | 8             | -0.994406    | 2.808068     | 1.316856     |
| 3  | 8             | 1.670790     | 2.965146     | 0.411739     |
| 4  | 7             | -1.199753    | 0.403670     | -0.057193    |
| 5  | 7             | 1.484184     | 0.225074     | -0.113281    |
| 6  | 6             | -2.263399    | 2.968092     | 0.961025     |
| 7  | 6             | -2.951008    | 4.114228     | 1.478820     |
| 8  | 6             | -4.250960    | 4.417632     | 1.093873     |
| 9  | 6             | -4.940283    | 3.586398     | 0.167377     |
| 10 | 6             | -4.312404    | 2.447928     | -0.323372    |
| 11 | 6             | -2.983792    | 2.075778     | 0.069677     |
| 12 | 6             | -2.421503    | 0.811472     | -0.396211    |

|    |   |           |           |           |
|----|---|-----------|-----------|-----------|
| 13 | 6 | -3.261135 | -0.028224 | -1.334410 |
| 14 | 6 | -4.393383 | -0.745784 | -0.896964 |
| 15 | 6 | -5.152732 | -1.499759 | -1.808024 |
| 16 | 6 | -4.797807 | -1.533749 | -3.170853 |
| 17 | 6 | -3.677457 | -0.806875 | -3.616700 |
| 18 | 6 | -2.911759 | -0.060116 | -2.702086 |
| 19 | 6 | -0.673858 | -0.947741 | -0.419721 |
| 20 | 6 | -1.521921 | -2.128604 | 0.053125  |
| 21 | 6 | -2.168272 | -2.130339 | 1.307103  |
| 22 | 6 | -2.888521 | -3.257380 | 1.735453  |
| 23 | 6 | -2.968632 | -4.403759 | 0.919645  |
| 24 | 6 | -2.324342 | -4.410084 | -0.331572 |
| 25 | 6 | -1.607867 | -3.276831 | -0.758975 |
| 26 | 6 | 2.882650  | 2.837573  | -0.117041 |
| 27 | 6 | 3.690170  | 4.021245  | -0.185240 |
| 28 | 6 | 4.964417  | 4.004178  | -0.737885 |
| 29 | 6 | 5.513129  | 2.795193  | -1.250808 |
| 30 | 6 | 4.762474  | 1.628340  | -1.184983 |
| 31 | 6 | 3.442741  | 1.597936  | -0.624019 |
| 32 | 6 | 2.732338  | 0.328279  | -0.550275 |
| 33 | 6 | 3.466695  | -0.919599 | -0.991020 |
| 34 | 6 | 4.268439  | -1.640291 | -0.081881 |
| 35 | 6 | 4.948825  | -2.798787 | -0.501051 |
| 36 | 6 | 4.835542  | -3.245826 | -1.832014 |
| 37 | 6 | 4.038868  | -2.526182 | -2.744109 |
| 38 | 6 | 3.358765  | -1.367118 | -2.325393 |
| 39 | 6 | 0.808499  | -1.080018 | 0.109369  |
| 40 | 6 | 0.960909  | -1.522582 | 1.572663  |
| 41 | 6 | 0.704397  | -0.664399 | 2.664944  |
| 42 | 6 | 0.862932  | -1.117999 | 3.985816  |
| 43 | 6 | 1.281421  | -2.438555 | 4.240056  |
| 44 | 6 | 1.542707  | -3.300512 | 3.158684  |
| 45 | 6 | 1.386669  | -2.841244 | 1.838305  |
| 46 | 1 | -2.392570 | 4.747437  | 2.161965  |
| 47 | 1 | -4.738058 | 5.305800  | 1.491733  |
| 48 | 1 | -5.947603 | 3.837995  | -0.152480 |
| 49 | 1 | -4.847144 | 1.818768  | -1.026542 |



|    |   |           |           |           |
|----|---|-----------|-----------|-----------|
| 50 | 1 | -4.672173 | -0.722156 | 0.152581  |
| 51 | 1 | -6.016941 | -2.056931 | -1.455329 |
| 52 | 1 | -5.389232 | -2.113503 | -3.875514 |
| 53 | 1 | -3.405153 | -0.813553 | -4.669422 |
| 54 | 1 | -2.058954 | 0.516602  | -3.054892 |
| 55 | 1 | -0.595520 | -1.007191 | -1.515403 |
| 56 | 1 | -2.112122 | -1.252688 | 1.944575  |
| 57 | 1 | -3.380865 | -3.244990 | 2.705082  |
| 58 | 1 | -3.525633 | -5.276186 | 1.253574  |
| 59 | 1 | -2.385888 | -5.286453 | -0.972735 |
| 60 | 1 | -1.128094 | -3.281948 | -1.736665 |
| 61 | 1 | 3.249468  | 4.931418  | 0.210839  |
| 62 | 1 | 5.546266  | 4.922972  | -0.778798 |
| 63 | 1 | 6.509330  | 2.784469  | -1.684040 |
| 64 | 1 | 5.187797  | 0.706867  | -1.569614 |
| 65 | 1 | 4.360651  | -1.296283 | 0.944939  |
| 66 | 1 | 5.565427  | -3.346173 | 0.207532  |
| 67 | 1 | 5.364387  | -4.139183 | -2.155255 |
| 68 | 1 | 3.953125  | -2.859884 | -3.775382 |
| 69 | 1 | 2.755751  | -0.804293 | -3.034770 |
| 70 | 1 | 1.263222  | -1.863018 | -0.507280 |
| 71 | 1 | 0.375961  | 0.358945  | 2.505547  |
| 72 | 1 | 0.661495  | -0.440645 | 4.812223  |
| 73 | 1 | 1.404619  | -2.787235 | 5.262730  |
| 74 | 1 | 1.867782  | -4.322217 | 3.340951  |
| 75 | 1 | 1.594828  | -3.514131 | 1.008779  |

---

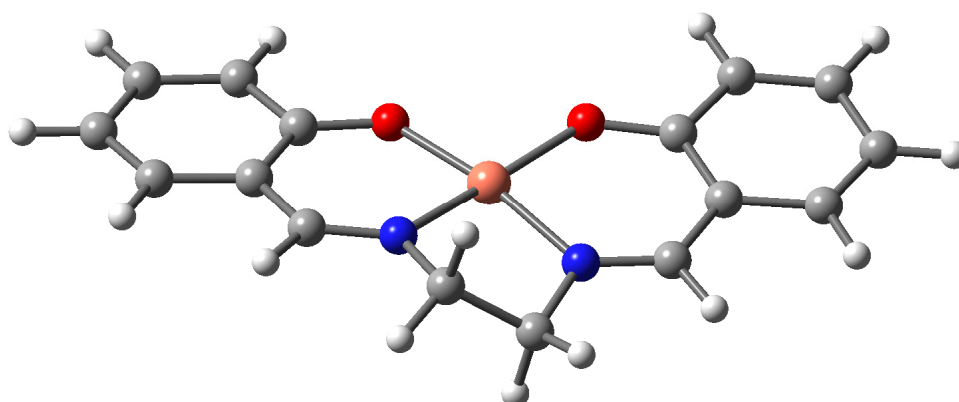

**Fig. S6.** Molecular structure of **2** optimized by the DFT calculation.

**Table S3.** Molecular coordinates of **2** optimized by the density functional calculation

|    | Atomic number | $x/\text{Å}$ | $y/\text{Å}$ | $z/\text{Å}$ |
|----|---------------|--------------|--------------|--------------|
| 1  | 29            | 0.000019     | 0.124268     | -0.000078    |
| 2  | 8             | 1.399739     | -1.203840    | -0.053575    |
| 3  | 8             | -1.399770    | -1.203828    | 0.053339     |
| 4  | 7             | 1.314963     | 1.592724     | 0.204635     |
| 5  | 7             | -1.314932    | 1.592706     | -0.204316    |
| 6  | 6             | 2.715003     | -1.033150    | -0.044076    |
| 7  | 6             | 3.555185     | -2.190202    | -0.156870    |
| 8  | 6             | 4.941652     | -2.080274    | -0.155275    |
| 9  | 6             | 5.581559     | -0.811324    | -0.039426    |
| 10 | 6             | 4.795602     | 0.328297     | 0.073538     |
| 11 | 6             | 3.366465     | 0.255546     | 0.074099     |
| 12 | 6             | 2.625772     | 1.478573     | 0.203691     |
| 13 | 6             | 0.656154     | 2.901738     | 0.404809     |
| 14 | 6             | -0.656147    | 2.901779     | -0.404336    |
| 15 | 6             | -2.625751    | 1.478529     | -0.203887    |
| 16 | 6             | -3.366482    | 0.255523     | -0.074374    |
| 17 | 6             | -4.795608    | 0.328287     | -0.073957    |
| 18 | 6             | -5.581578    | -0.811312    | 0.039289     |
| 19 | 6             | -4.941681    | -2.080205    | 0.155595     |

|    |   |           |           |           |
|----|---|-----------|-----------|-----------|
| 20 | 6 | -3.555214 | -2.190167 | 0.157263  |
| 21 | 6 | -2.715005 | -1.033166 | 0.044072  |
| 22 | 1 | 3.059078  | -3.152332 | -0.243530 |
| 23 | 1 | 5.548882  | -2.979146 | -0.243268 |
| 24 | 1 | 6.665561  | -0.742430 | -0.038395 |
| 25 | 1 | 5.265858  | 1.307368  | 0.165796  |
| 26 | 1 | 3.224354  | 2.392309  | 0.314245  |
| 27 | 1 | 1.302211  | 3.737684  | 0.098191  |
| 28 | 1 | 0.423078  | 3.020783  | 1.473058  |
| 29 | 1 | -1.302229 | 3.737654  | -0.097583 |
| 30 | 1 | -0.423094 | 3.021002  | -1.472573 |
| 31 | 1 | -3.224292 | 2.392260  | -0.314693 |
| 32 | 1 | -5.265860 | 1.307332  | -0.166496 |
| 33 | 1 | -6.665579 | -0.742407 | 0.038112  |
| 34 | 1 | -5.548910 | -2.979047 | 0.243922  |
| 35 | 1 | -3.059142 | -3.152288 | 0.244218  |

---

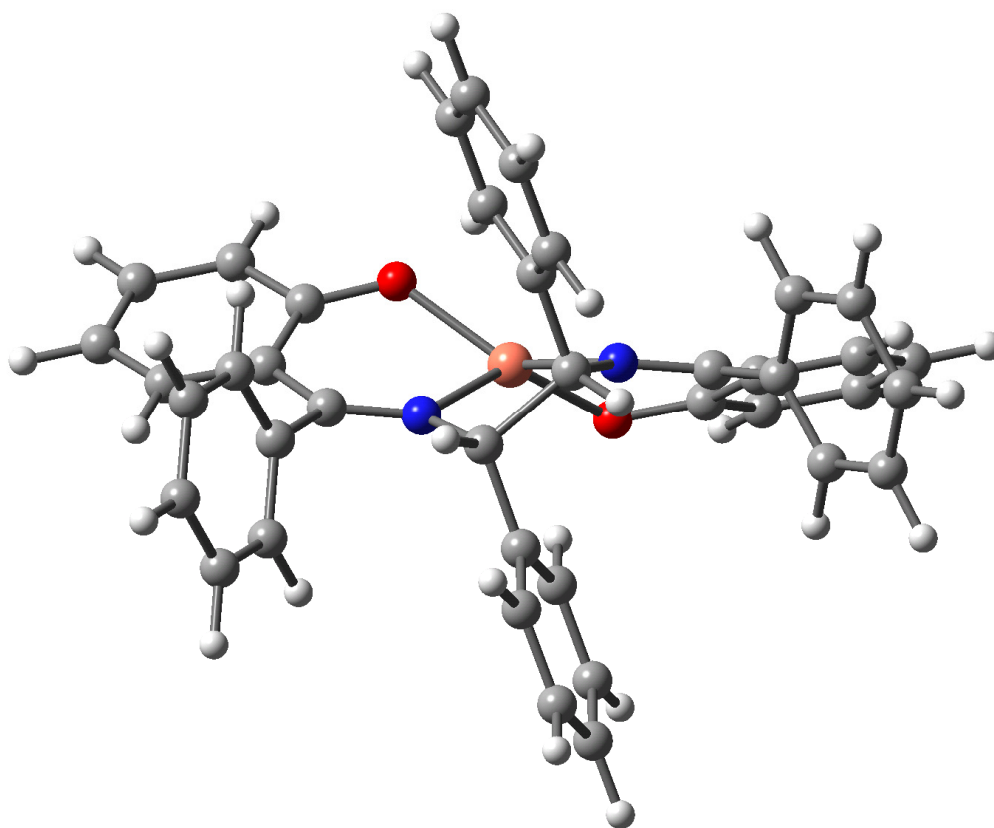

**Fig. S7.** Molecular structure of [*rac-1*]<sup>−</sup> optimized by the DFT calculation.

**Table S4.** Molecular coordinates of [*rac-1*]<sup>−</sup> optimized by the density functional calculation

|    | Atomic number | <i>x</i> /Å | <i>y</i> /Å | <i>z</i> /Å |
|----|---------------|-------------|-------------|-------------|
| 1  | 29            | -0.000323   | 1.851088    | -0.000913   |
| 2  | 8             | 1.552364    | 2.785849    | -0.915060   |
| 3  | 8             | -1.553204   | 2.784654    | 0.915793    |
| 4  | 7             | 1.342241    | 0.247454    | 0.427316    |
| 5  | 7             | -1.342296   | 0.246986    | -0.426822   |
| 6  | 6             | 2.818387    | 2.663990    | -0.581574   |
| 7  | 6             | 3.709912    | 3.759704    | -0.891066   |
| 8  | 6             | 5.059313    | 3.748364    | -0.559250   |
| 9  | 6             | 5.629034    | 2.621046    | 0.094203    |
| 10 | 6             | 4.809649    | 1.528764    | 0.380745    |
| 11 | 6             | 3.416788    | 1.494636    | 0.064999    |

|    |   |           |           |           |
|----|---|-----------|-----------|-----------|
| 12 | 6 | 2.658635  | 0.269661  | 0.373486  |
| 13 | 6 | 3.466483  | -0.998245 | 0.591174  |
| 14 | 6 | 4.138996  | -1.606231 | -0.492409 |
| 15 | 6 | 4.874153  | -2.791341 | -0.306459 |
| 16 | 6 | 4.963469  | -3.376772 | 0.972639  |
| 17 | 6 | 4.302415  | -2.772068 | 2.059757  |
| 18 | 6 | 3.553341  | -1.595513 | 1.867302  |
| 19 | 6 | 0.577521  | -1.009626 | 0.549793  |
| 20 | 6 | -0.003054 | -1.210910 | 1.951281  |
| 21 | 6 | 0.063545  | -2.493405 | 2.540416  |
| 22 | 6 | -0.485849 | -2.738505 | 3.813122  |
| 23 | 6 | -1.110390 | -1.693632 | 4.521348  |
| 24 | 6 | -1.178250 | -0.410606 | 3.942037  |
| 25 | 6 | -0.633527 | -0.166716 | 2.667889  |
| 26 | 6 | -2.818960 | 2.663342  | 0.581099  |
| 27 | 6 | -3.710483 | 3.759357  | 0.889518  |
| 28 | 6 | -5.059611 | 3.748207  | 0.556553  |
| 29 | 6 | -5.629047 | 2.620851  | -0.097091 |
| 30 | 6 | -4.809656 | 1.528334  | -0.382744 |
| 31 | 6 | -3.417076 | 1.494058  | -0.065851 |
| 32 | 6 | -2.658727 | 0.269048  | -0.373599 |
| 33 | 6 | -3.466375 | -0.998975 | -0.591222 |
| 34 | 6 | -3.552356 | -1.596919 | -1.867092 |
| 35 | 6 | -4.301320 | -2.773562 | -2.059437 |
| 36 | 6 | -4.963138 | -3.377677 | -0.972459 |
| 37 | 6 | -4.874707 | -2.791565 | 0.306390  |
| 38 | 6 | -4.139665 | -1.606366 | 0.492216  |
| 39 | 6 | -0.577394 | -1.010085 | -0.548369 |
| 40 | 6 | 0.003287  | -1.212446 | -1.949661 |
| 41 | 6 | 0.633219  | -0.168662 | -2.667329 |
| 42 | 6 | 1.178140  | -0.413530 | -3.941202 |
| 43 | 6 | 1.111031  | -1.697188 | -4.519190 |
| 44 | 6 | 0.487034  | -2.741676 | -3.809915 |
| 45 | 6 | -0.062559 | -2.495580 | -2.537491 |
| 46 | 1 | 3.252946  | 4.614830  | -1.384517 |
| 47 | 1 | 5.682465  | 4.610581  | -0.798647 |
| 48 | 1 | 6.682165  | 2.608321  | 0.366206  |

|    |   |           |           |           |
|----|---|-----------|-----------|-----------|
| 49 | 1 | 5.248905  | 0.666932  | 0.877514  |
| 50 | 1 | 4.079298  | -1.147467 | -1.476114 |
| 51 | 1 | 5.377205  | -3.252474 | -1.154110 |
| 52 | 1 | 5.539185  | -4.288804 | 1.118997  |
| 53 | 1 | 4.365729  | -3.213541 | 3.052334  |
| 54 | 1 | 3.036883  | -1.136637 | 2.706670  |
| 55 | 1 | 1.191963  | -1.890471 | 0.313661  |
| 56 | 1 | 0.558649  | -3.301092 | 2.002744  |
| 57 | 1 | -0.422446 | -3.734076 | 4.249381  |
| 58 | 1 | -1.534607 | -1.875132 | 5.507461  |
| 59 | 1 | -1.660054 | 0.405023  | 4.477320  |
| 60 | 1 | -0.702411 | 0.825936  | 2.231598  |
| 61 | 1 | -3.253772 | 4.614509  | 1.383164  |
| 62 | 1 | -5.682784 | 4.610616  | 0.795205  |
| 63 | 1 | -6.681965 | 2.608290  | -0.369929 |
| 64 | 1 | -5.248654 | 0.666467  | -0.879692 |
| 65 | 1 | -3.035322 | -1.138502 | -2.706356 |
| 66 | 1 | -4.363955 | -3.215560 | -3.051824 |
| 67 | 1 | -5.538767 | -4.289777 | -1.118730 |
| 68 | 1 | -5.378362 | -3.252235 | 1.153934  |
| 69 | 1 | -4.080651 | -1.147056 | 1.475707  |
| 70 | 1 | -1.191786 | -1.890787 | -0.311582 |
| 71 | 1 | 0.701462  | 0.824472  | -2.232039 |
| 72 | 1 | 1.659510  | 0.401817  | -4.477303 |
| 73 | 1 | 1.535407  | -1.879472 | -5.505088 |
| 74 | 1 | 0.424217  | -3.737733 | -4.245147 |
| 75 | 1 | -0.557232 | -3.302994 | -1.999014 |

---

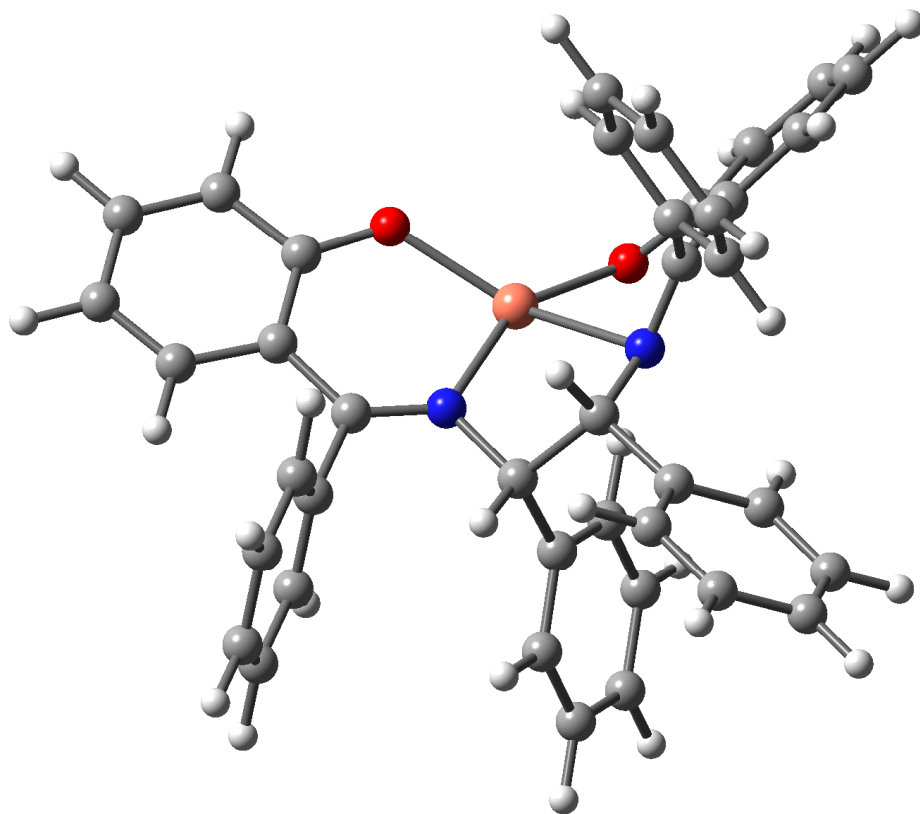

**Fig. S8.** Molecular structure of [*meso-1*]<sup>−</sup> optimized by the DFT calculation.

**Table S5.** Molecular coordinates of [*meso-1*]<sup>−</sup> optimized by the density functional calculation

|    | Atomic number | $x/\text{Å}$ | $y/\text{Å}$ | $z/\text{Å}$ |
|----|---------------|--------------|--------------|--------------|
| 1  | 29            | -0.195601    | -1.528507    | -1.081780    |
| 2  | 8             | -1.821297    | -1.731641    | -2.189949    |
| 3  | 8             | 0.752635     | -3.249030    | -0.555311    |
| 4  | 7             | -1.452051    | 0.310216     | -0.271127    |
| 5  | 7             | 1.301811     | -0.402456    | -0.343675    |
| 6  | 6             | -3.048015    | -1.715871    | -1.695729    |
| 7  | 6             | -4.086646    | -2.421204    | -2.401398    |
| 8  | 6             | -5.393806    | -2.499867    | -1.925281    |
| 9  | 6             | -5.748467    | -1.893578    | -0.690686    |
| 10 | 6             | -4.765102    | -1.203874    | 0.025081     |

|    |   |           |           |           |
|----|---|-----------|-----------|-----------|
| 11 | 6 | -3.428717 | -1.066052 | -0.445595 |
| 12 | 6 | -2.470308 | -0.268377 | 0.341199  |
| 13 | 6 | -2.667201 | -0.239728 | 1.844941  |
| 14 | 6 | -3.002235 | 0.938484  | 2.547555  |
| 15 | 6 | -3.180618 | 0.916480  | 3.944591  |
| 16 | 6 | -3.014674 | -0.283392 | 4.662282  |
| 17 | 6 | -2.676143 | -1.464194 | 3.970154  |
| 18 | 6 | -2.513419 | -1.443085 | 2.573671  |
| 19 | 6 | -0.464566 | 1.141230  | 0.435353  |
| 20 | 6 | -0.891413 | 2.609538  | 0.529070  |
| 21 | 6 | -1.800742 | 3.176676  | -0.388894 |
| 22 | 6 | -2.152822 | 4.535693  | -0.298567 |
| 23 | 6 | -1.600447 | 5.351180  | 0.709042  |
| 24 | 6 | -0.691336 | 4.792458  | 1.628956  |
| 25 | 6 | -0.342395 | 3.432383  | 1.536266  |
| 26 | 6 | 1.989688  | -3.357493 | -0.137009 |
| 27 | 6 | 2.535573  | -4.690515 | 0.010626  |
| 28 | 6 | 3.838303  | -4.926592 | 0.424346  |
| 29 | 6 | 4.698860  | -3.835453 | 0.734155  |
| 30 | 6 | 4.207430  | -2.537657 | 0.621432  |
| 31 | 6 | 2.870821  | -2.236415 | 0.198699  |
| 32 | 6 | 2.463031  | -0.826286 | 0.137860  |
| 33 | 6 | 3.456330  | 0.183626  | 0.692278  |
| 34 | 6 | 4.326012  | 0.888957  | -0.165894 |
| 35 | 6 | 5.244656  | 1.821544  | 0.352556  |
| 36 | 6 | 5.301408  | 2.065683  | 1.738939  |
| 37 | 6 | 4.434891  | 1.365881  | 2.602314  |
| 38 | 6 | 3.523850  | 0.427659  | 2.081354  |
| 39 | 6 | 0.923829  | 1.038881  | -0.310699 |
| 40 | 6 | 0.945361  | 1.651287  | -1.715497 |
| 41 | 6 | 0.147428  | 1.160633  | -2.777049 |
| 42 | 6 | 0.222268  | 1.755685  | -4.049775 |
| 43 | 6 | 1.082414  | 2.845984  | -4.288817 |
| 44 | 6 | 1.874180  | 3.342913  | -3.236220 |
| 45 | 6 | 1.803875  | 2.744768  | -1.963755 |
| 46 | 1 | -3.793533 | -2.901450 | -3.332638 |
| 47 | 1 | -6.145886 | -3.040367 | -2.500946 |



|    |   |           |           |           |
|----|---|-----------|-----------|-----------|
| 48 | 1 | -6.765535 | -1.959947 | -0.309911 |
| 49 | 1 | -5.033360 | -0.728964 | 0.967305  |
| 50 | 1 | -3.132690 | 1.868588  | 2.001862  |
| 51 | 1 | -3.446556 | 1.833430  | 4.467138  |
| 52 | 1 | -3.148285 | -0.300034 | 5.742472  |
| 53 | 1 | -2.543013 | -2.397256 | 4.514020  |
| 54 | 1 | -2.265057 | -2.355502 | 2.036932  |
| 55 | 1 | -0.270043 | 0.780480  | 1.461459  |
| 56 | 1 | -2.225532 | 2.543678  | -1.162022 |
| 57 | 1 | -2.855263 | 4.957569  | -1.014842 |
| 58 | 1 | -1.874974 | 6.402265  | 0.778040  |
| 59 | 1 | -0.261390 | 5.410364  | 2.415444  |
| 60 | 1 | 0.349973  | 3.002415  | 2.259050  |
| 61 | 1 | 1.858402  | -5.504644 | -0.237344 |
| 62 | 1 | 4.204264  | -5.949975 | 0.509662  |
| 63 | 1 | 5.724103  | -4.009959 | 1.052804  |
| 64 | 1 | 4.875182  | -1.715465 | 0.860615  |
| 65 | 1 | 4.280579  | 0.705536  | -1.236410 |
| 66 | 1 | 5.910164  | 2.354581  | -0.323373 |
| 67 | 1 | 6.009302  | 2.788123  | 2.140368  |
| 68 | 1 | 4.471872  | 1.544690  | 3.675088  |
| 69 | 1 | 2.866876  | -0.124447 | 2.749609  |
| 70 | 1 | 1.622633  | 1.621853  | 0.301736  |
| 71 | 1 | -0.538269 | 0.336545  | -2.603893 |
| 72 | 1 | -0.398249 | 1.364295  | -4.853477 |
| 73 | 1 | 1.133184  | 3.300700  | -5.276932 |
| 74 | 1 | 2.539750  | 4.188434  | -3.402313 |
| 75 | 1 | 2.417933  | 3.134275  | -1.153336 |

---

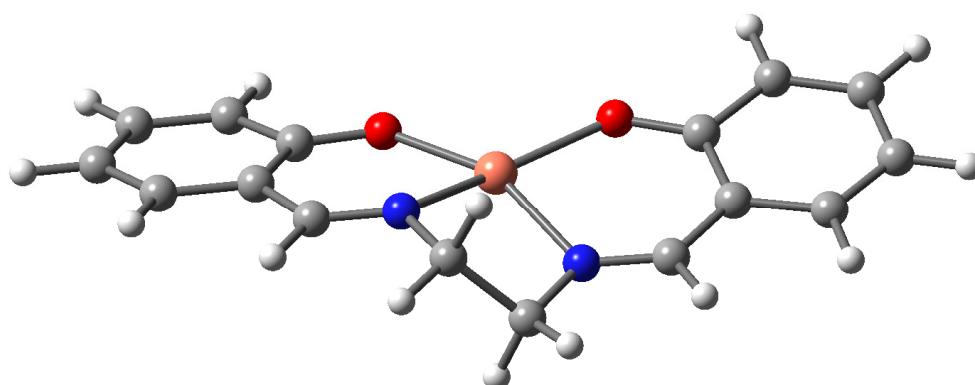

**Fig. S9.** Molecular structure of  $[2]^-$  optimized by the DFT calculation.

**Table S6.** Molecular coordinates of  $[2]^-$  optimized by the density functional calculation

|    | Atomic number | $x/\text{\AA}$ | $y/\text{\AA}$ | $z/\text{\AA}$ |
|----|---------------|----------------|----------------|----------------|
| 1  | 29            | -0.000001      | -0.161756      | 0.000051       |
| 2  | 8             | 1.690368       | -1.359798      | -0.100728      |
| 3  | 8             | -1.690418      | -1.359810      | 0.101013       |
| 4  | 7             | 1.294858       | 1.453284       | 0.477637       |
| 5  | 7             | -1.294774      | 1.453245       | -0.477475      |
| 6  | 6             | 2.957447       | -1.030346      | -0.072770      |
| 7  | 6             | 3.961190       | -2.048956      | -0.307095      |
| 8  | 6             | 5.325392       | -1.778498      | -0.273968      |
| 9  | 6             | 5.804621       | -0.459415      | -0.028641      |
| 10 | 6             | 4.869753       | 0.555597       | 0.179330       |
| 11 | 6             | 3.463664       | 0.319605       | 0.174367       |
| 12 | 6             | 2.600553       | 1.470198       | 0.358648       |
| 13 | 6             | 0.555556       | 2.723392       | 0.542804       |
| 14 | 6             | -0.555470      | 2.723350       | -0.542725      |
| 15 | 6             | -2.600488      | 1.470169       | -0.358693      |
| 16 | 6             | -3.463641      | 0.319608       | -0.174424      |
| 17 | 6             | -4.869725      | 0.555632       | -0.179587      |
| 18 | 6             | -5.804642      | -0.459343      | 0.028332       |

|    |   |           |           |           |
|----|---|-----------|-----------|-----------|
| 19 | 6 | -5.325474 | -1.778424 | 0.273803  |
| 20 | 6 | -3.961284 | -2.048914 | 0.307118  |
| 21 | 6 | -2.957485 | -1.030339 | 0.072864  |
| 22 | 1 | 3.587351  | -3.052520 | -0.499366 |
| 23 | 1 | 6.037911  | -2.587211 | -0.441748 |
| 24 | 1 | 6.872225  | -0.250615 | -0.009605 |
| 25 | 1 | 5.215090  | 1.576626  | 0.358460  |
| 26 | 1 | 3.125958  | 2.444593  | 0.367381  |
| 27 | 1 | 1.208413  | 3.608388  | 0.402126  |
| 28 | 1 | 0.075119  | 2.801792  | 1.530003  |
| 29 | 1 | -1.208337 | 3.608350  | -0.402122 |
| 30 | 1 | -0.075027 | 2.801681  | -1.529927 |
| 31 | 1 | -3.125884 | 2.444565  | -0.367633 |
| 32 | 1 | -5.215015 | 1.576657  | -0.358830 |
| 33 | 1 | -6.872238 | -0.250520 | 0.009148  |
| 34 | 1 | -6.038035 | -2.587107 | 0.441545  |
| 35 | 1 | -3.587493 | -3.052475 | 0.499497  |

---

## References

1. Gaussian 03, Revision B.05, M. J. Frisch, G. W. Trucks, H. B. Schlegel, G. E. Scuseria, M. A. Robb, J. R. Cheeseman, J. A. Montgomery, Jr., T. Vreven, K. N. Kudin, J. C. Burant, J. M. Millam, S. S. Iyengar, J. Tomasi, V. Barone, B. Mennucci, M. Cossi, G. Scalmani, N. Rega, G. A. Petersson, H. Nakatsuji, M. Hada, M. Ehara, K. Toyota, R. Fukuda, J. Hasegawa, M. Ishida, T. Nakajima, Y. Honda, O. Kitao, H. Nakai, M. Klene, X. Li, J. E. Knox, H. P. Hratchian, J. B. Cross, C. Adamo, J. Jaramillo, R. Gomperts, R. E. Stratmann, O. Yazyev, A. J. Austin, R. Cammi, C. Pomelli, J. W. Ochterski, P. Y. Ayala, K. Morokuma, G. A. Voth, P. Salvador, J. J. Dannenberg, V. G. Zakrzewski, S. Dapprich, A. D. Daniels, M. C. Strain, O. Farkas, D. K. Malick, A. D. Rabuck, K. Raghavachari, J. B. Foresman, J. V. Ortiz, Q. Cui, A. G. Baboul, S. Clifford, J. Cioslowski, B. B. Stefanov, G. Liu, A. Liashenko, P. Piskorz, I. Komaromi, R. L. Martin, D. J. Fox, T. Keith, M. A. Al-Laham, C. Y. Peng, A. Nanayakkara, M. Challacombe, P. M. W. Gill, B. Johnson, W. Chen, M. W. Wong, C. Gonzalez, and J. A. Pople, Gaussian, Inc., Pittsburgh PA, 2003.
2. M. M. Bhadbhade and D. Srinivas, *Inorg. Chem.*, 1993, **32**, 6122-6130.
